# Supplementary material for: Pirfenidone as salvage treatment for refractory bleomycin-induced lung injury: a case report of seminoma
Source: Springer Nature journal article supplement (doi:10.1186/s12885-017-3521-0), 2017-08-07
Supplement: MOESM1 [file 13354578]

Supplementary table 1: Summary of the treatment experience of BILI with novel therapeutic regimens

| Reference    | Type of cancer     | Age | Sex    | Chemo-therapy regimen | Cycles of chemo-therapy | Novel therapeutics used to ameliorate BILI                    | Preceding treatment with low dose of steroids | Concomitant use of corticosteroids | Outcome                                    |
|--------------|--------------------|-----|--------|-----------------------|-------------------------|---------------------------------------------------------------|-----------------------------------------------|------------------------------------|--------------------------------------------|
| [16]         | Hodgkin's lymphoma | 65  | male   | AVBD                  | 6                       | <b>300 mg of imatinib mesylate</b>                            | methylprednisolone 2 mg/kg                    | ?, possibly yes                    | resolution of BILI                         |
| [15]         | Hodgkin's lymphoma | 55  | female | unknown               | 5                       | <b>pirfenidone (400 mg tid) and NAC (600 mg tid)</b>          | -                                             | yes, 40 mg per day                 | resolution of BILI                         |
| [15]         | Hodgkin's lymphoma | 45  | male   | AVBD                  | 6                       | <b>pirfenidone (600 mg tid) and NAC (600 mg tid)</b>          | prednisolone 1 mg/kg                          | yes, prednisolone 2 mg/kg per day  | resolution of BILI                         |
| [17]         | Hodgkin's lymphoma | 65  | female | AVBD                  | 4                       | <b>pulse corticosteroid (methylprednisolone, 1 g per day)</b> | methylprednisolone 240 mg per day with NAC    | -                                  | marked improvement, some fibrosis remained |
| Current case | Seminoma           | 63  | male   | PEB                   | 2                       | <b>pirfenidone (600 mg tid)</b>                               | prednisone, 10-30mg per day                   | yes, prednisone 10mg per day       | resolution of BILI                         |

abbreviations: AVBD = adriamycin, vincristine, bleomycin, doxorubicin; PEB = cisplatin, etoposide, bleomycin; NAC = N-acetylcysteine; BILI = bleomycin-induced lung injury; tid = three times a day

supplementary reference

17. Gupta R, Ettinger NA. Beyond conventional therapy: role of pulse steroids in bleomycin induced lung injury. *Respir Care*. 2014 Jan;59(1):e9-e12.
